# Supplementary material
Source: PubMed Central journal article supplement (PMC5565161)
Supplement: NIHMS895383-supplement-Supplemental_Figure_1.pdf [file NIHMS895383-supplement-Supplemental_Figure_1.pdf]

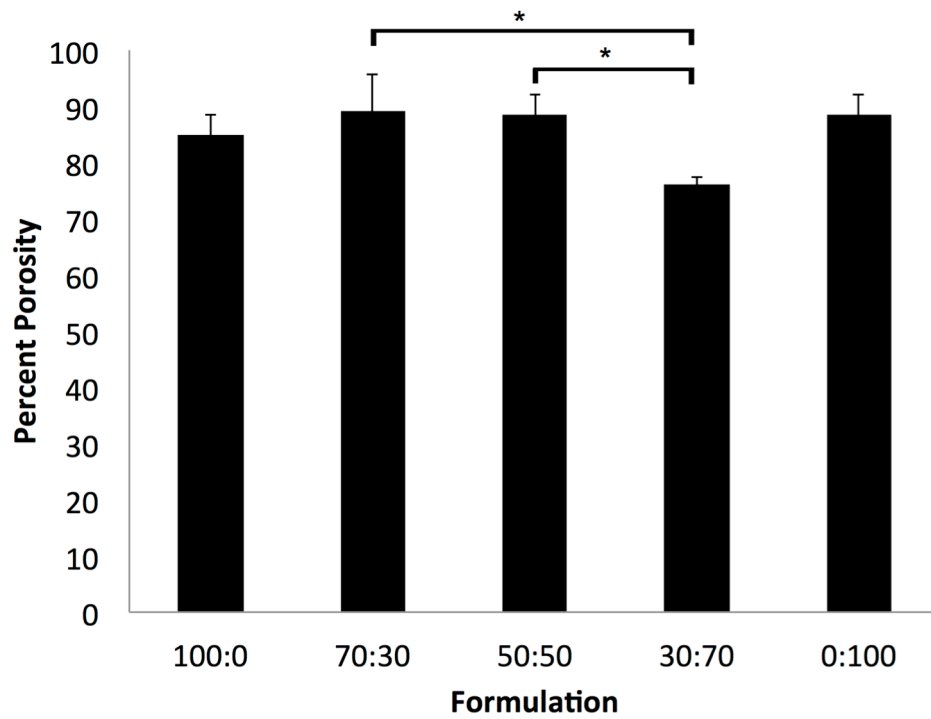

**Supplemental Figure 1:** Keratin gel porosity as determined by mercury intrusion porosimetry. Formulations connected by lines are significantly different ( $P < 0.05$ ) as determined by ANOVA with Tukey's post-hoc test. Error bars represent standard deviation.  $N = 3$  for 100:0, 70:30, and 50:50.  $N = 2$  for 30:70 and 0:100.
